# Supplementary material
Source: Research Square preprint supplement (doi:10.21203/rs.3.rs-9988816/v1)
Supplement: Supplementary file 1 [file 7603b8b4ae56676fa27b77fd.pdf]

## Appendix 2: Description of Method 2 with multiple day-level PA observations and multiple one-time measured covariates

Two different sources of variability are essential for variance adjustment: variability of PA across participants (between-individual variability) and day-to-day variability within a participant (within-individual variability). When we have multiple day-level PA observations (expressed as a  $p$ -dimensional vector  $\mathbf{X}_{ij}$ ) and multiple one-time measured covariates (expressed as a  $q$ -dimensional vector  $\mathbf{Z}_i$ ), these are represented by covariance matrices. For  $\mathbf{X}_{ij}$ , we use the following decomposition:

$$\mathbf{X}_{ij} = \boldsymbol{\xi}_i + \boldsymbol{\nu}_{ij},$$

where  $\boldsymbol{\xi}_i \in \mathbb{R}^p$  captures the latent, person-specific deviation for participant  $i$ , and  $\boldsymbol{\nu}_{ij} \in \mathbb{R}^p$  is the day-to-day fluctuation for day  $j$  of participant  $i$ . Here,  $\boldsymbol{\Sigma}_{\xi\xi}$  is the between-individual covariance matrix and  $\boldsymbol{\Sigma}_{\nu\nu}$  is the within-individual covariance matrix.

For each individual  $i$ , we construct two weight matrices that determine the contribution of the observed participant mean and the covariates to the adjusted estimate. Specifically, a  $p \times p$  matrix  $\mathbf{W}_{i1}$  and a  $q \times p$  matrix  $\mathbf{W}_{i2}$  are defined as:

$$\mathbf{W}_{i1} = (\boldsymbol{\Sigma}_{\xi\xi} + \boldsymbol{\Sigma}_{\nu\nu}/g_i - \boldsymbol{\Sigma}_{\xi z} \boldsymbol{\Sigma}_{zz}^{-1} \boldsymbol{\Sigma}_{z\xi})^{-1} (\boldsymbol{\Sigma}_{\xi\xi} - \boldsymbol{\Sigma}_{\xi z} \boldsymbol{\Sigma}_{zz}^{-1} \boldsymbol{\Sigma}_{z\xi})$$

and

$$\mathbf{W}_{i2} = \boldsymbol{\Sigma}_{zz}^{-1} \boldsymbol{\Sigma}_{z\xi} (\mathbf{I}_{p \times p} - \mathbf{W}_{i1}),$$

where  $\mathbf{I}_{p \times p}$  denotes the  $p \times p$  identity matrix. These weight matrices determine the extent to which the observed participant-level mean  $\bar{\mathbf{X}}_i$  and the deviation of covariates ( $\mathbf{Z}_i - \boldsymbol{\mu}_z$ ) contribute to the adjusted estimate. The resulting variance-adjusted mean is given by

$$\tilde{\mathbf{X}}_i' = \boldsymbol{\mu}'_{\xi} (\mathbf{I}_{p \times p} - \mathbf{W}_{i1}) + \bar{\mathbf{X}}_i' \mathbf{W}_{i1} + (\mathbf{Z}_i - \boldsymbol{\mu}_z)' \mathbf{W}_{i2}.$$
