# Supplementary material
Source: Research Square preprint supplement (doi:10.21203/rs.3.rs-9988816/v1)
Supplement: Supplementary file 2 [file 903e253bef73cda3834b57eb.docx]

Appendix 3

*Cohorts*

We used the National Health and Nutrition Examination Survey (NHANES) from the 2011-2012 and 2013-2014 cycles. NHANES consists of multiple modules, and we included patients who could be linked across the following modules used for independent and dependent variables: physical activity (PA) measured by accelerometers, PA measured by survey, demographics, medical conditions, and physical functions. Additionally, we included only patients who were 20 or more years old and who were diagnosed with osteoarthritis. Furthermore, patients with at least one PA observation measured by accelerometers except for the first and last day were included. Since the response rates differed between the two outcomes, we analyzed them separately by creating Cohort 1 for Outcome 1 and Cohort 2 for Outcome 2. Cohort 2 is a subset of Cohort 1.

Figure S1 Inclusion and exclusion criteria for the two patient cohorts. Abbreviations: DX = diagnosis; OA = osteoarthritis PA = physical activity.

*Outcomes*

We used the following survey question for the outcome of *NeedEquip*: “Because of a health problem, {do you/does your spouse} have difficulty walking without using any special equipment?” Responses were coded as Yes or No.

For the outcome *PoorFunction*, thirteen of the twenty physical functioning questions, which were selected by the orthopedic surgeons on our team, were used:

- Walking for a quarter mile difficulty
- Walking up ten steps difficulty
- Lifting or carrying difficulty
- House chore difficulty
- Preparing meals difficulty
- Walking between rooms on same floor
- Standing up from armless chair difficulty
- Getting in and out of bed difficulty
- Dressing yourself difficulty
- Sitting for long periods difficulty
- Going out to movies, events difficulty
- Attending social event difficulty
- Push or pull large objects difficulty.

Participants who reported “Much difficulty” or “Unable to do” for at least one of these items were classified as having poor physical functioning.
