# Supplementary material
Source: Research Square preprint supplement (doi:10.21203/rs.3.rs-9988816/v1)
Supplement: Supplementary file 3 [file 9ce47515d72c76cc4288107a.docx]

Appendix 1

Appendix Table 1.1. NHANES variables used in the analysis

|  | Cohort 1: *NeedEquip* | | | Cohort 2: *PoorFunction* | | |
| --- | --- | --- | --- | --- | --- | --- |
| Variables | Total | No | Yes | Total | No | Yes |
| One-time measured covariates – Categorical (n, %) |  |  |  |  |  |  |
| **Gender** |  |  |  |  |  |  |
| Male | 855 (38.5%) | 627 (73.3%) | 228 (26.7%) | 716 (39.0%) | 487 (68.0%) | 229 (32.0%) |
| Female | 1368 (61.5%) | 1015 (74.2%) | 353 (25.8%) | 1122 (61.0%) | 638 (56.9%) | 484 (43.1%) |
| **Age** |  |  |  |  |  |  |
| 20-44 | 243 (10.9%) | 204 (84.0%) | 39 (16.0%) | 123 (6.7%) | 67 (54.5%) | 56 (45.5%) |
| 45-64 | 946 (42.6%) | 729 (77.1%) | 217 (22.9%) | 681 (37.1%) | 388 (57.0%) | 293 (43.0%) |
| 65+ | 1034 (46.5%) | 709 (68.6%) | 325 (31.4%) | 1034 (56.3%) | 670 (64.8%) | 364 (35.2%) |
| **Race/Hispanic origin** |  |  |  |  |  |  |
| Mexican American | 192 (8.6%) | 139 (72.4%) | 53 (27.6%) | 145 (7.9%) | 72 (49.7%) | 73 (50.3%) |
| Other Hispanic | 190 (8.5%) | 140 (73.7%) | 50 (26.3%) | 161 (8.8%) | 91 (56.5%) | 70 (43.5%) |
| Non-Hispanic White | 1125 (50.6%) | 871 (77.4%) | 254 (22.6%) | 942 (51.3%) | 605 (64.2%) | 337 (35.8%) |
| Non-Hispanic Black | 557 (25.1%) | 370 (66.4%) | 187 (33.6%) | 466 (25.4%) | 286 (61.4%) | 180 (38.6%) |
| Other Race | 159 (7.2%) | 122 (76.7%) | 37 (23.3%) | 124 (6.7%) | 71 (57.3%) | 53 (42.7%) |
| **Education level** |  |  |  |  |  |  |
| 11th grade or below | 579 (26.0%) | 378 (65.3%) | 201 (34.7%) | 506 (27.5%) | 261 (51.6%) | 245 (48.4%) |
| High school graudate/GED or equivalent | 517 (23.3%) | 378 (73.1%) | 139 (26.9%) | 434 (23.6%) | 258 (59.4%) | 176 (40.6%) |
| Some college or AA degree | 701 (31.5%) | 522 (74.5%) | 179 (25.5%) | 564 (30.7%) | 350 (62.1%) | 214 (37.9%) |
| College graduate or above | 426 (19.2%) | 364 (85.4%) | 62 (14.6%) | 334 (18.2%) | 256 (76.6%) | 78 (23.4%) |
| **Marital status** |  |  |  |  |  |  |
| Married or Living with partner | 1197 (53.8%) | 960 (80.2%) | 237 (19.8%) | 944 (51.4%) | 655 (69.4%) | 289 (30.6%) |
| Widowed, divorced, or separated | 818 (36.8%) | 533 (65.2%) | 285 (34.8%) | 743 (40.4%) | 389 (52.4%) | 354 (47.6%) |
| Never married | 208 (9.4%) | 149 (71.6%) | 59 (28.4%) | 151 (8.2%) | 81 (53.6%) | 70 (46.4%) |
| **Annual household income** |  |  |  |  |  |  |
| Under $20K | 688 (30.9%) | 412 (59.9%) | 276 (40.1%) | 614 (33.4%) | 287 (46.7%) | 327 (53.3%) |
| $20K-<$45K | 646 (29.1%) | 487 (75.4%) | 159 (24.6%) | 552 (30.0%) | 343 (62.1%) | 209 (37.9%) |
| $45K-<$75K | 509 (22.9%) | 414 (81.3%) | 95 (18.7%) | 397 (21.6%) | 281 (70.8%) | 116 (29.2%) |
| $75K+ | 380 (17.1%) | 329 (86.6%) | 51 (13.4%) | 275 (15.0%) | 214 (77.8%) | 61 (22.2%) |
| **Doctor told you to control weight** |  |  |  |  |  |  |
| No | 1272 (57.2%) | 979 (77.0%) | 293 (23.0%) | 1052 (57.2%) | 688 (65.4%) | 364 (34.6%) |
| Yes | 951 (42.8%) | 663 (69.7%) | 288 (30.3%) | 786 (42.8%) | 437 (55.6%) | 349 (44.4%) |
| **Doctor told you to increase physical activity** |  |  |  |  |  |  |
| No | 1061 (47.7%) | 811 (76.4%) | 250 (23.6%) | 867 (47.2%) | 561 (64.7%) | 306 (35.3%) |
| Yes | 1162 (52.3%) | 831 (71.5%) | 331 (28.5%) | 971 (52.8%) | 564 (58.1%) | 407 (41.9%) |
| **Currently controlling weight** |  |  |  |  |  |  |
| No | 706 (31.8%) | 503 (71.2%) | 203 (28.8%) | 588 (32%) | 337 (57.3%) | 251 (42.7%) |
| Yes | 1517 (68.2%) | 1139 (75.1%) | 378 (24.9%) | 1250 (68%) | 788 (63%) | 462 (37.0%) |
| **Currently increasing physical activity** |  |  |  |  |  |  |
| No | 907 (40.8%) | 623 (68.7%) | 284 (31.3%) | 776 (42.2%) | 427 (55.0%) | 349 (45.0%) |
| Yes | 1316 (59.2%) | 1019 (77.4%) | 297 (22.6%) | 1062 (57.8%) | 698 (65.7%) | 364 (34.3%) |
| One-time measured covariates – Numeric (mean, sd) |  |  |  |  |  |  |
| **Number of days with vigorous work** | 0.46 (1.41) | 0.53 (1.50) | 0.27 (1.11) | 0.35 (1.22) | 0.40 (1.28) | 0.27 (1.12) |
| **Number of days with moderate work** | 1.16 (2.08) | 1.36 (2.21) | 0.61 (1.55) | 1.03 (1.98) | 1.23 (2.10) | 0.72 (1.74) |
| **Number of days walk or bicycle** | 0.90 (2.05) | 0.99 (2.14) | 0.64 (1.77) | 0.83 (2.00) | 1.00 (2.15) | 0.58 (1.70) |
| **Number of days with vigorous recreational activities** | 0.36 (1.18) | 0.45 (1.30) | 0.11 (0.66) | 0.28 (1.06) | 0.37 (1.20) | 0.14 (0.76) |
| **Number of days with moderate recreational activities** | 1.25 (2.07) | 1.45 (2.15) | 0.68 (1.68) | 1.21 (2.07) | 1.53 (2.23) | 0.70 (1.66) |
| Averaged daily physical activity summaries (mean, sd) |  |  |  |  |  |  |
| **MIMS triaxial value** | 8.03 (2.62) | 8.49 (2.54) | 6.73 (2.42) | 7.70 (2.50) | 8.12 (2.33) | 7.04 (2.62) |
| **Number of wake wear minutes** | 0.59 (0.10) | 0.60 (0.09) | 0.56 (0.11) | 0.59 (0.10) | 0.60 (0.09) | 0.57 (0.11) |
| **Number of sleep wear minutes** | 0.33 (0.09) | 0.32 (0.08) | 0.36 (0.10) | 0.34 (0.09) | 0.33 (0.08) | 0.35 (0.10) |
